# Supplementary material
Source: PubMed Central journal article supplement (PMC2078455)
Supplement: oenvmed_oem.2006.026872_1.pdf [file oenvmed_oem.2006.026872_1.pdf]

**Table S1: Risk of low birth weight and pattern of occupational activity**

| Authors (date)                            | Outcome | Numbers in analysis | RR (95% CI) |               | Exposure                            |        | Higher potential for |              | Incomplete reporting |     |
|-------------------------------------------|---------|---------------------|-------------|---------------|-------------------------------------|--------|----------------------|--------------|----------------------|-----|
|                                           |         |                     |             |               | Comparison                          | Timing | Bias                 | Confounding* |                      |     |
| <b>WEEKLY WORKING HOURS</b>               |         |                     |             |               |                                     |        |                      |              |                      |     |
| <b>Cohort studies</b>                     |         |                     |             |               |                                     |        |                      |              |                      |     |
| Hatch M (1997) <sup>16</sup>              | LBW     | 188                 | 1.2         | (0.5 - 2.3)   | >40 vs ≤20                          |        | Trimester 1          | No           | No                   | No  |
| Hatch M (1997) <sup>16</sup>              | LBW     | 148                 | 1.1         | (0.4 - 3.2)   | >40 vs ≤20                          |        | Trimester 2          | No           | No                   | No  |
| Hatch M (1997) <sup>16</sup>              | LBW     | 122                 | 1.7         | (0.6 - 5.0)   | >40 vs ≤20                          |        | Trimester 3          | No           | No                   | No  |
| Tuntiseranee P (1998) <sup>50</sup>       | LBW     | 886                 | 1.2         | (0.6 - 2.3)   | ≥61 vs ≤50                          |        | 15 - 28 weeks        | No           | Yes                  | No  |
| <b>Cross-sectional studies</b>            |         |                     |             |               |                                     |        |                      |              |                      |     |
| Bodin L (1999) <sup>8</sup>               | LBW     | 1685                | 1.5         | (0.7 - 3.1)   | ≥36 vs 21-35                        |        | Trimester 2          | No           | No                   | No  |
| McDonald AD (1988) <sup>28</sup>          | LBW     | unclear             | 1.24        | P<0.05        | ≥46 vs <46                          |        | Not stated           | No           | No                   | No  |
| Peoples-Sheps MD (1991) <sup>35</sup>     | LBW     | 2379                | 1.7         | (1.03 - 2.68) | ≥40 vs 21-39                        |        | Not stated           | No           | Yes                  | No  |
| Saurel-Cubizolles MJ (1987) <sup>41</sup> | LBW     | 2375                | 0.96        | (0.42 - 1.95) | ≥42 vs <42                          |        | Trimester 1          | No           | Yes                  | Yes |
| Savitz DA (1996) <sup>44</sup>            | MLB     | 768                 | 0.9         | (0.8 - 1.1)   | ≥40 vs no paid work                 |        | 5 months             | No           | No                   | No  |
| Savitz DA (1996) <sup>44</sup>            | VLB     | 696                 | 0.9         | (0.7 - 1.0)   | ≥40 vs no paid work                 |        | 5 months             | No           | No                   | No  |
| <b>SHIFT WORK</b>                         |         |                     |             |               |                                     |        |                      |              |                      |     |
| <b>Cohort studies</b>                     |         |                     |             |               |                                     |        |                      |              |                      |     |
| Xu X (1994) <sup>53</sup>                 | LBW     | 887                 | 2.1         | (1.1 - 4.1)   | Rotating shift work (yes vs no)     |        | Not stated           | No           | No                   | No  |
| Zhu JL (2004) <sup>54</sup>               | LBW     | 35662               | 1.02        | (0.68 - 1.51) | Rotating shift work vs daytime work |        | Trimesters 1 & 2     | No           | No                   | No  |
| <b>Cross-sectional studies</b>            |         |                     |             |               |                                     |        |                      |              |                      |     |
| Bodin L (1999) <sup>8</sup>               | LBW     | 1685                | 1.9         | (0.6 - 5.8)   | Night vs day                        |        | Trimester 2          | No           | No                   | No  |
| McDonald AD (1988) <sup>28</sup>          | LBW     | unclear             | 1.38        | P<0.01        | Changing shift vs not               |        | Not stated           | No           | No                   | No  |
| Saurel-Cubizolles MJ (1987) <sup>41</sup> | LBW     | 2392                | 1.28        | (0.4 - 3.21)  | Night vs day                        |        | Trimester 1          | No           | Yes                  | Yes |
| <b>LIFTING</b>                            |         |                     |             |               |                                     |        |                      |              |                      |     |
| <b>Cohort studies</b>                     |         |                     |             |               |                                     |        |                      |              |                      |     |
| Ahlborg GJ (1990) <sup>5</sup>            | LBW     | 3389                | 0.7         | (0.29 - 1.68) | ≥12 kg >50 x/wk vs none             |        | Not stated           | No           | No                   | No  |
| Hatch M (1997) <sup>16</sup>              | LBW     | 569                 | 0.6         | (0.3 - 1.1)   | High vs low                         |        | Trimester 1          | No           | No                   | No  |
| Hatch M (1997) <sup>16</sup>              | LBW     | 513                 | 1.1         | (0.6 - 2.1)   | High vs low                         |        | Trimester 2          | No           | No                   | No  |

| Authors (date)                            | Outcome | Numbers in analysis | RR (95% CI) |               | Exposure                                          |                      | Higher potential for |              | Incomplete reporting |  |
|-------------------------------------------|---------|---------------------|-------------|---------------|---------------------------------------------------|----------------------|----------------------|--------------|----------------------|--|
|                                           |         |                     |             |               | Comparison                                        | Timing               | Bias                 | Confounding* |                      |  |
| Hatch M (1997) <sup>16</sup>              | LBW     | 479                 | 1.3         | (0.7 - 2.6)   | High vs low                                       | Trimester 3          | No                   | No           | No                   |  |
| Tuntiseranee P (1998) <sup>50</sup>       | LBW     | 1108                | 0.5         | (0.2 - 1.2)   | >12 kg, 1-10 x/d vs none                          | 15 - 28 weeks        | No                   | Yes          | No                   |  |
| <b>Case-control studies</b>               |         |                     |             |               |                                                   |                      |                      |              |                      |  |
| Schramm WF (1996) <sup>45</sup>           | MLB     | 1582                | 0.92        | (0.8 - 1.14)  | Carrying of loads >9 kg on most days (yes vs no)  | 'On most days'       | No                   | Yes          | No                   |  |
| Schramm WF (1996) <sup>45</sup>           | VLB     | 1560                | 0.85        | (0.69 - 1.04) | Carrying of loads (>9 kg on most days (yes vs no) | 'On most days'       | Yes                  | Yes          | No                   |  |
| <b>Cross-sectional studies</b>            |         |                     |             |               |                                                   |                      |                      |              |                      |  |
| McDonald AD (1988) <sup>28</sup>          | LBW     | unclear             | 1.26        | P<0.01        | Lifting heavy weights ≥15 vs <15x/d               | Not stated           | No                   | No           | No                   |  |
| Saurel-Cubizolles MJ (1987) <sup>41</sup> | LBW     | 2391                | 1.13        | (0.74 - 1.71) | Carrying of heavy loads (yes vs no)               | Trimester 1          | No                   | Yes          | Yes                  |  |
| Wergeland E (1998) <sup>52</sup>          | LBW     | 1542                | 2.4         | (1.3 - 4.4)   | Lifting heavy loads (10-20 kg) (yes vs no)        | Trimester 1          | No                   | No           | No                   |  |
| <b>STANDING</b>                           |         |                     |             |               |                                                   |                      |                      |              |                      |  |
| <b>Cohort studies</b>                     |         |                     |             |               |                                                   |                      |                      |              |                      |  |
| Hatch M (1997) <sup>16</sup>              | LBW     | 569                 | 0.7         | (0.3 - 1.3)   | ≥8 vs <8 h/d                                      | Trimester 1          | No                   | No           | No                   |  |
| Hatch M (1997) <sup>16</sup>              | LBW     | 511                 | 0.7         | (0.3 - 1.6)   | ≥8 vs <8 h/d                                      | Trimester 2          | No                   | No           | No                   |  |
| Hatch M (1997) <sup>16</sup>              | LBW     | 477                 | 0.7         | (0.3 - 1.6)   | ≥8 vs <8 h/d                                      | Trimester 3          | No                   | No           | No                   |  |
| Teitelman AM (1990) <sup>49</sup>         | LBW     | 708                 | 1.58        | (0.51 - 4.94) | Standing still >3 h/d vs continuous active motion | Trimester 1 (mostly) | No                   | No           | No                   |  |
| Tuntiseranee P (1998) <sup>50</sup>       | LBW     | 1121                | 1.6         | (0.8 - 16.5)  | ≥5 vs ≤4 h/d                                      | 15 - 28 weeks        | No                   | Yes          | No                   |  |
| <b>Case-control studies</b>               |         |                     |             |               |                                                   |                      |                      |              |                      |  |
| Meyer BA (1985) <sup>30</sup>             | LBW     | 5822                | 1.19        | (0.96 - 1.48) | Standing vs sitting                               | Not stated           | No                   | Yes          | No                   |  |
| Schramm WF (1996) <sup>45</sup>           | MLB     | 1582                | 1.06        | (0.86 - 1.31) | >3 vs ≤3 h/d                                      | 'On most days'       | No                   | Yes          | No                   |  |
| Schramm WF (1996) <sup>45</sup>           | VLB     | 1560                | 1.01        | (0.82 - 1.24) | >3 vs ≤3 h/d                                      | 'On most days'       | Yes                  | Yes          | No                   |  |
| <b>Cross-sectional studies</b>            |         |                     |             |               |                                                   |                      |                      |              |                      |  |
| McDonald AD (1988) <sup>28</sup>          | LBW     | -                   | 1.02        | P>0.05        | Standing ≥8 vs <8 h/d                             | Not stated           | No                   | No           | No                   |  |
| Saurel-Cubizolles MJ (1987) <sup>41</sup> | LBW     | 2400                | 1.13        | (0.73 - 1.72) | Standing (yes vs no)                              | Trimester 1          | No                   | Yes          | Yes                  |  |
| Wergeland E (1998) <sup>52</sup>          | LBW     | 1542                | 0.5         | (0.3 - 1.0)   | Standing/walking (yes vs no)                      | Trimester 1          | No                   | No           | No                   |  |

## PHYSICAL ACTIVITY

| Authors (date)                            | Outcome | Numbers in analysis | RR (95% CI)        | Exposure                                    |        | Higher potential for |              | Incomplete reporting |     |
|-------------------------------------------|---------|---------------------|--------------------|---------------------------------------------|--------|----------------------|--------------|----------------------|-----|
|                                           |         |                     |                    | Comparison                                  | Timing | Bias                 | Confounding* |                      |     |
| <b>Cohort studies</b>                     |         |                     |                    |                                             |        |                      |              |                      |     |
| Tuntiseranee P (1998) <sup>50</sup>       | LBW     | 346                 | 1.1 (0.5 - 5.0)    | High vs low                                 |        | 15 - 28 weeks        | No           | Yes                  | No  |
| <b>Cross-sectional studies</b>            |         |                     |                    |                                             |        |                      |              |                      |     |
| Homer CJ (1990) <sup>18</sup>             | LBW     | 773                 | 2.7 (1.5 - 4.8)    | High vs low exertion job                    |        | Not stated           | No           | No                   | No  |
| McDonald AD (1988) <sup>28</sup>          | LBW     | unclear             | 1.02 P>0.05        | Great physical effort (Yes vs No)           |        | Not stated           | No           | No                   | No  |
| Peoples-Sheps MD (1991) <sup>35</sup>     | LBW     | 502                 | 0.6 (0.1 - 2.2)    | High vs low strength requirement            |        | Not stated           | No           | Yes                  | Yes |
| Saurel-Cubizolles MJ (1985) <sup>40</sup> | LBW     | 587                 | 1.64 (0.65 - 3.79) | Activity score (2/3 vs 0/1 strenuous items) |        | Not stated           | No           | Yes                  | No  |
| Saurel-Cubizolles MJ (1987) <sup>41</sup> | LBW     | 2389                | 1.95 (1.1 - 3.34)  | Activity score (3/4 items vs none)          |        | Trimester 1          | No           | Yes                  | Yes |

LBW - low birth weight

MLB - moderately low birth weight

VLB - very low birth weight

RR – measure of relative risk

\* As described in the text, risk estimates were classified as having a higher potential for confounding if they did not take account both of smoking and at least one of: socioeconomic status, maternal height, or pre-pregnancy weight. Additionally, outcomes in this table do not allow for gestational age.

**Table S2: Mean differences in birth weight by pattern of occupational activity**

| Authors (date)                    | Numbers in analysis | Mean difference (grams) (95% CI) | Exposure                                          |        | Higher potential for |              | Incomplete reporting |     |
|-----------------------------------|---------------------|----------------------------------|---------------------------------------------------|--------|----------------------|--------------|----------------------|-----|
|                                   |                     |                                  | Comparison                                        | Timing | Bias                 | Confounding* |                      |     |
| <b>WEEKLY WORKING HOURS</b>       |                     |                                  |                                                   |        |                      |              |                      |     |
| <b>Cohort studies</b>             |                     |                                  |                                                   |        |                      |              |                      |     |
| Hatch M (1997) <sup>16</sup>      | 188                 | -70.8 (-201.7 to 60.1)           | >40 vs ≤20                                        |        | Trimester 1          | No           | No                   | No  |
| Hatch M (1997) <sup>16</sup>      | 148                 | -57 (-203.2 to 89.2)             | >40 vs ≤20                                        |        | Trimester 2          | No           | No                   | No  |
| Hatch M (1997) <sup>16</sup>      | 122                 | -82.2 (-238 to 73.6)             | >40 vs ≤20                                        |        | Trimester 3          | No           | No                   | No  |
| <b>Cross-sectional studies</b>    |                     |                                  |                                                   |        |                      |              |                      |     |
| Bodin L (1999) <sup>8</sup>       | 1685                | -60 (-112 to -8)                 | ≥36 vs 21 - 35)                                   |        | Trimester 2          | No           | No                   | No  |
| Klebanoff MA (1990) <sup>20</sup> | 989                 | -32 -                            | residents (>100 h) vs others                      |        | Any                  | No           | Yes                  | No  |
| Wergeland E (1998) <sup>52</sup>  | 3159                | -84 (-124 to -44)                | ≥35 vs <35                                        |        | Trimester 1          | No           | Yes                  | No  |
| <b>SHIFT WORK</b>                 |                     |                                  |                                                   |        |                      |              |                      |     |
| <b>Cohort studies</b>             |                     |                                  |                                                   |        |                      |              |                      |     |
| Xu X (1994) <sup>53</sup>         | 887                 | -79 (-161 to 3)                  | Rotating shift vs not                             |        | Not stated           | No           | Yes                  | No  |
| Zhu JL (2004) <sup>54</sup>       | 35662               | 10 (-8 to 28)                    | Rotating shift work vs daytime work               |        | Trimesters 1 & 2     | No           | Yes                  | No  |
| <b>Cross-sectional studies</b>    |                     |                                  |                                                   |        |                      |              |                      |     |
| Axelsson G (1989) <sup>6</sup>    | 52                  | -312 (-705 to 81)                | Rotating shift vs days, birth order 2 non-smokers |        | Trimesters 2 & 3     | No           | Yes                  | Yes |
| Axelsson G (1989) <sup>6</sup>    | 67                  | 195 (-169 to 559)                | Rotating shift vs days, birth order 1 non-smoker  |        | Trimesters 2 & 3     | No           | Yes                  | Yes |
| Axelsson G (1989) <sup>6</sup>    | 25                  | -421 (-1043 to 202)              | Rotating shift vs days, birth order 2 smokers     |        | Trimesters 2 & 3     | No           | Yes                  | Yes |
| Axelsson G (1989) <sup>6</sup>    | 58                  | -438 (-996 to 90)                | Rotating shift vs days, birth order 1 smoker      |        | Trimesters 2 & 3     | No           | Yes                  | Yes |
| Bodin L (1999) <sup>8</sup>       | 1685                | 36 (-46 to 119)                  | Night vs day shift                                |        | Trimester 2          | No           | No                   | No  |
| Bodin L (1999) <sup>8</sup>       | 1685                | 39 (-45 to 123)                  | Three shifts vs day                               |        | Trimester 2          | No           | No                   | No  |

| Authors (date)                        | Numbers in analysis | Mean difference (grams) (95% CI) | Exposure                                          |                      | Higher potential for |              | Incomplete reporting |
|---------------------------------------|---------------------|----------------------------------|---------------------------------------------------|----------------------|----------------------|--------------|----------------------|
|                                       |                     |                                  | Comparison                                        | Timing               | Bias                 | Confounding* |                      |
| <b>LIFTING</b>                        |                     |                                  |                                                   |                      |                      |              |                      |
| <b>Cohort studies</b>                 |                     |                                  |                                                   |                      |                      |              |                      |
| Florack E (1995) <sup>12</sup>        | 128                 | -21 (-209 to 167)                | ≥1 vs <1 h/d                                      | Pre-pregnancy        | No                   | No           | Yes                  |
| Hatch M (1997) <sup>16</sup>          | 569                 | 18.9 (-69.8 to 107.7)            | High vs low                                       | Trimester 1          | No                   | No           | No                   |
| Hatch M (1997) <sup>16</sup>          | 513                 | -44.8 (-147.1 to 57.5)           | High vs low                                       | Trimester 2          | No                   | No           | No                   |
| Hatch M (1997) <sup>16</sup>          | 479                 | -23.6 (-135.7 to 88.5)           | High vs low                                       | Trimester 3          | No                   | No           | No                   |
| <b>Cross-sectional studies</b>        |                     |                                  |                                                   |                      |                      |              |                      |
| Wergeland E (1998) <sup>52</sup>      | 3274                | 11 (-34 to 56)                   | Lifting heavy loads (10 - 20 kg) (yes vs no)      | Trimester 1          | No                   | Yes          | No                   |
| <b>STANDING</b>                       |                     |                                  |                                                   |                      |                      |              |                      |
| <b>Cohort studies</b>                 |                     |                                  |                                                   |                      |                      |              |                      |
| Brink-Henriksen T (1995) <sup>9</sup> | 4249                | -40 (-107 to 27)                 | ≥4 vs <4 h/d uninterrupted                        | 16 weeks             | No                   | No           | No                   |
| Brink-Henriksen T (1995) <sup>9</sup> | 4249                | -49 (-108 to 10)                 | >5 vs ≤2 h/d                                      | 16 weeks             | No                   | No           | No                   |
| Hatch M (1997) <sup>16</sup>          | 569                 | 1.8 (-98.4 to 102)               | ≥8 vs <8 h/d                                      | Trimester 1          | No                   | No           | No                   |
| Hatch M (1997) <sup>16</sup>          | 511                 | -0.8 (-123.5 to 121.9)           | ≥8 vs <8 h/d                                      | Trimester 2          | No                   | No           | No                   |
| Hatch M (1997) <sup>16</sup>          | 477                 | -30.7 (-149.5 to 88.1)           | ≥8 vs <8 h/d                                      | Trimester 3          | No                   | No           | No                   |
| Klebanoff MA (1990) <sup>21</sup>     | 7101                | -32 -                            | ≥8 vs 0 h/d                                       | 1 - 5 months         | No                   | No           | No                   |
| Teitelman AM (1990) <sup>49</sup>     | 708                 | -24.7 (-111.6 to -62.2)          | Standing still >3 h/d vs continuous active motion | Trimester 1 (mostly) | No                   | No           | No                   |
| <b>Cross-sectional studies</b>        |                     |                                  |                                                   |                      |                      |              |                      |
| Wergeland E (1998) <sup>52</sup>      | 3284                | 20 (-20 to 60)                   | Standing/walking (yes vs no)                      | Trimester 1          | No                   | Yes          | No                   |
| Zuckerman (1986) <sup>55</sup>        | 942                 | 2 -                              | Standing at work (yes vs no)                      | Trimester 3          | No                   | Yes          | Yes                  |
| <b>PHYSICAL ACTIVITY</b>              |                     |                                  |                                                   |                      |                      |              |                      |
| <b>Cohort studies</b>                 |                     |                                  |                                                   |                      |                      |              |                      |
| Florack E (1995) <sup>12</sup>        | 128                 | -60 (-256 to 136)                | High vs low intensity score                       | 6 - 22 wks           | No                   | No           | Yes                  |
| Florack E (1995) <sup>12</sup>        | 118                 | -58 (-236 to 120)                | High vs low intensity score                       | 23 - 30 wks          | No                   | No           | Yes                  |
| Florack E (1995) <sup>12</sup>        | 98                  | -67 (-265 to 131)                | High vs low intensity score                       | 31 - 40 weeks        | No                   | No           | Yes                  |
| Hatch M (1997) <sup>16</sup>          | 569                 | -49.6 (-177.4 to 78.2)           | High vs low                                       | Trimester 1          | No                   | No           | No                   |
| Hatch M (1997) <sup>16</sup>          | 511                 | -21.6 (-179.6 to 136.4)          | High vs low                                       | Trimester 2          | No                   | No           | No                   |

| Authors (date)                    | Numbers in analysis | Mean difference (grams) (95% CI) | Exposure                                   |               | Higher potential for |              | Incomplete reporting |
|-----------------------------------|---------------------|----------------------------------|--------------------------------------------|---------------|----------------------|--------------|----------------------|
|                                   |                     |                                  | Comparison                                 | Timing        | Bias                 | Confounding* |                      |
| Hatch M (1997) <sup>16</sup>      | 477                 | -51.7 (-216.3 to 112.9)          | High vs low                                | Trimester 3   | No                   | No           | No                   |
| Klebanoff MA (1990) <sup>21</sup> | 7100                | 51 -                             | Heavy work vs not                          | 1 - 5 months  | No                   | No           | No                   |
| Magann EF (1996) <sup>25</sup>    | 531                 | 183 (40 to 326)                  | >2900 vs <2300 kcal/d energy expenditure   | 16 - 18 weeks | No                   | Yes          | No                   |
| Rao S (2003) <sup>38</sup>        | 433                 | -111 (-155 to -67)               | High vs low activity (farming)             | 18 weeks      | No                   | Yes          | No                   |
| <b>Cross-sectional studies</b>    |                     |                                  |                                            |               |                      |              |                      |
| Homer CJ (1990)                   | 773                 | -160 (-230 to -89)               | High vs low exertion                       | Not stated    | No                   | No           | No                   |
| Tafari N (1980) <sup>48</sup>     | 41                  | -204 (-424 to 16)                | Hard vs light work, maternal wt <49 kg     | Not stated    | No                   | Yes          | Yes                  |
| Tafari N (1980) <sup>48</sup>     | 61                  | -164 (-344 to 16)                | Hard vs light work, maternal wt 49 - 58 kg | Not stated    | No                   | Yes          | Yes                  |
| Tafari N (1980) <sup>48</sup>     | 28                  | -216 (-605 to 173)               | Hard vs light work, maternal wt >58 kg     | Not stated    | No                   | No           | Yes                  |

\* As described in the text, risk estimates were classified as having a higher potential for confounding if they did not take account both of smoking and at least one of: socioeconomic status, maternal height, or pre-pregnancy weight. Additionally, we sought evidence that account was taken of gestational age.

Rabkin et al<sup>36</sup> also considered group differences in mean birth weight, but presented their findings graphically as a series of adjusted mean birth weights with 95%CI. Comparisons included hours of paid work (none, <7, 7-8.4, >8.5), usual work posture (including standing and sitting), and estimated energy expenditure. Data were available for exposures at 17, 28 and 36 weeks of pregnancy. Confidence intervals overlapped with no significant differences between groups. The authors concluded that these exposures had little discernable association with birth weight.

**Comment:**

In most comparisons the exposed group had a lower mean birth weight, although 95%CI for mean difference usually straddled zero grams. Large effect sizes (mean difference >100 gms) were only found in three studies,<sup>6,38,48</sup> two of which were assessed as of lower quality.
